# Supplementary material
Source: publisher site journal article supplement (https://www.degruyterbrill.com/publication/journal_key/AOFO/downloadAsset/AOFO_Hinweise%20f%C3%BCr%20Autoren_2024--de.docx)
Supplement: Supplementary file 1 [file AOFO_Hinweise%20f%C3%BCr%20Autoren_2024--de.docx]

Altorientalische Forschungen

Die Zeitschrift *Altorientalischen Forschungen* veröffentlicht Aufsätze und Beiträge zu Geschichte, Kultur und Sprachen des Alten Orients und dessen Wechselbeziehungen mit angrenzenden Regionen wie Zentralasien, Ägypten und der Ägäis. Dabei finden philologische und archäologische (inklusive kunsthistorische) Untersuchungen gleichermaßen Berücksichtigung. Alle Beiträge haben ein Gutachterverfahren durchlaufen. Die Zeitschrift erscheint in Online- und Druckversion.

Hinweise für Autoren

*Manuskripte* sind als Word-Datei und als pdf an die Redaktionsadresse (aof@degruyter.com) zu richten.

*Abbildungen* und *Tabellen/Grafiken*

- Einzeln und nicht in den Text eingebettet einreichen – mit Hinweis im Fließtext, wo ungefähr sie platziert werden sollen (am besten mit der Abbildungs-/Tabellenunterschrift).
- Zeichnungen erfordern eine Auflösung von 1000 dpi, Fotografien möglichst 600 dpi, mindestens aber 300 dpi.
- Bei sämtlichen Abbildungen ist die Quelle anzugeben. Der Autor muss im Besitz einer allfälligen Reproduktionsgenehmigung sein.

*Schriftsatz und Rechtschreibung*:

- Die Beiträge sind in einem Unicode-Schriftsatz (bevorzugt Times New Roman) zu verfassen. Deutschsprachige Beiträge sind in neuer deutscher Rechtschreibung gemäß „Duden – Die Rechtschreibung“ abzufassen, englischsprachige gemäß dem Oxford Style Manual oder dem Chicago Manual of Style.
- Fußnoten in Titel und Untertitel sind nicht möglich.

*Titel, Abstract, Keywords und Angaben zum Verfasser:*

- Jedem Beitrag sind ein *Abstract* von ca. 8–12 Zeilen in englischer Sprache sowie einige thematische „*Keywords*“ voranzustellen. Sie sind durch Kommata voneinander abzugrenzen und schließen ohne Punkt.
- Am Ende des Beitrags sollen der Name, das Institut, die Adresse, das Land und die E-Mail-Adresse des Autors genannt werden.
- Bitte bei langen Titeln einen Kurztitel für die Kopfzeile formulieren.

*Danksagungen/Anmerkungen/Hinweise auf Abkürzungsverzeichnisse* können nicht als erste Fußnote gesetzt werden, sondern stehen vor der Bibliografie.

*Abkürzungen* von Literatur folgen den Vorgaben des Reallexikons der Assyriologie und Vorderasiatischen Archäologie. Werden folgende andere Standardwerke verwendet, so sind diese sowie eventuelle zusätzliche Abkürzungen in den Anmerkungen vor der Bibliografie aufzuführen: Archiv für Orientforschung, Akkadisches Handwörterbuch, Chicago Assyrian Dictionary, Chicago Hittite Dictionary, Keilschriftbibliografie von Orientalia, Hethitisches Wörterbuch2 oder Deutsches Archäologisches Institut.

*Formatierungsvorgaben, Umschriftkonventionen*:

- Zahlen sind voll auszuschreiben, i.e. 264–265 (statt 264–5); Angaben „von–bis“ sind mit Halbgeviertstrich „–“ zu verbinden, nicht mit Bindestrich „-“, i.e. 264–265 (statt 264-265; 1998–2001; iii 5′–7′.
- ′ (Minutenstrich) statt ’ für den Zeilenstrich, e.g. KBo. 1.1 Rs. iii 12′ statt 12’.
- Kolumnenbezeichnungen werden kleingeschrieben.
- Anführungsstriche sind im Deutschen folgendermaßen zu setzen: „Der ‚Sitz im Leben‘ des Textes ...“; im Englischen hingegen: “as it is ‘known’ ...”.
- Zwischen zwei Zahlen steht immer eine Interpunktion, i.e. BPOA 1, 115 (statt BPOA 1 115).
- Im Fließtext werden sumerische Wörter gesperrt gesetzt, akkadische und hethitische *kursiv*.
- In den Umschriften wird Sumerisch in Normalschrift gesetzt, Akkadisch und Hethitisch *kursiv*.
- Für Sumerogramme und Zeichenformen sind kapitälchen zu verwenden, für Akkadogramme *kursive kapitälchen*.
- Hochgestellte Determinative werden kleingeschrieben.
- Es werden nur Indexzahlen (immer als Unicode-Sonderzeichen nicht kursiv) verwendet (a₂ und a₃ anstelle von á und à).
- Vor dem Einreichen sollten sämtliche internen Verknüpfungen gelöscht werden.

*Literaturangaben* folgen der Zitierweise nach Autor und Jahreszahl mit Bibliografie.

- Literaturverweise innerhalb des Beitrages sind mit Autorennamen (Jahreszahl: Seitenzahl) anzugeben, z.B. Güterbock (1973: 235) oder Reculeau/Feller (2012: 13).
- In Fußnoten werden Klammern nur dann verwendet, wenn das Zitat in einen vollständigen Satz eingebettet ist.
- Bei Literaturangaben innerhalb des Beitrages sind Autoren ausschließlich mit Nachnamen zu zitieren.
- Namen wie de Martino, von Soden oder Van De Mieroop werden in der Bibliografie so wie o.a. geschrieben und nach de, von und Van De alphabetisiert.
- Sämtliche online-Angaben sind mit dem Datum des letzten Zugriffs zu versehen.
- In englischsprachigen Überschriften und bibliografischen Angaben sind alle Wörter außer Präpositionen, Artikel und Konjunktionen großzuschreiben. („Title Case“), unabhängig von der Originalpublikation.
- Römische Zahlen für Bandnummern vermeiden und bei Zeitschriftenbänden nur Bandnummern, keine Heftnummern.
- Bei mehr als zwei Autoren oder Herausgebern wird im Beitrag nur der erste namentlich genannt, weitere werden mit „et al.“ angegeben. In der Bibliografie werden alle Autoren oder Herausgeber namentlich aufgeführt.
- Kommentierende Angaben im Literaturverzeichnis sowie die Erscheinungsorte sind in der Sprache des Beitrags anzugeben.

Die Literaturangaben in der Bibliografie sollen den Konventionen der folgenden Beispiele entsprechen:

Attinger, P. (2023): Glossaire sumérien-français, principalement des textes littéraires paléobabyloniens. Deuxième édition, revue et augmentée, <https://zenodo.org/records/8369441> (last access 13 February 2024/letzter Zugriff 13.2.24).

Güterbock, H.G. (1973): Hittite Hieroglyphic Seal Impressions from Korucutepe, JNES 32, 135–147.

Kühne, C./H. Otten (1971): Der Šaušgamuwa-Vertrag (StBoT 16), Wiesbaden.

Krebernik, M. (1984): Die Beschwörungen aus Fara und Ebla: Untersuchungen zur ältesten keilschriftlichen Beschwörungsliteratur (TSO 2), Hildesheim – Zürich – New York.

Singer, I. (1999): A Political History of Ugarit. In: W.G.E. Watson/N. Wyatt (ed.), Handbook of Ugaritic Studies (HdOr. 1/39), Leiden – Boston – Köln, 603–733.

Sjöberg, Å.W (1962), Rez. zu A. Salonen, Die Türen des alten Mesopotamien: Eine lexikalische und kulturgeschichtliche Untersuchung (= AASF B 124), Helsinki 1961, ZA 55, 261–264.

*Orts-, Personen-, Götternamen:* Die Wiedergabe von Ortsnamen soll im Text und auf Abbildungen nach dem Tübinger Atlas des Vorderen Orients, diejenige von Personen- und Götternamen nach den gängigen Normen der Assyriologie/Hethitologie (z.B. der des Reallexikons der Assyriologie und Vorderasiatischen Archäologie) erfolgen. Falls adaptierte bzw. „eingebürgerte“ Formen existieren, können diese in der ersten Erwähnung in Klammer gesetzt werden: z.B. Salmānu-ašarēd (Shalmanaser/Salmanassar).
